# Supplementary material for: Transcriptome analysis of grain development in hexaploid wheat
Source: Springer Nature journal article supplement (doi:10.1186/1471-2164-9-121), 2008-03-06

Figure S1. Daa versus geometric average of expression for gene clusters shown in Fig. 3 over the developmental series (left-hand panel) and the four CE samples (control, drought, heat, heat & drought; right-hand panels).

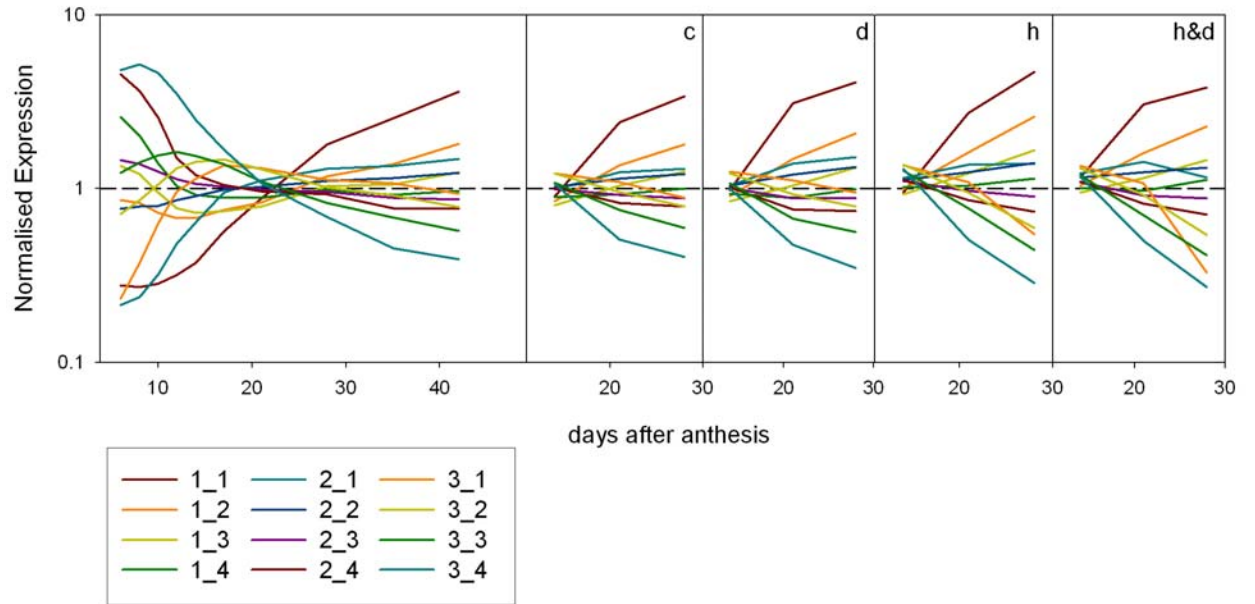

Supplement: 12864_2007_1315_MOESM3_ESM.pdf [file 12864_2007_1315_MOESM3_ESM.pdf]
