# Supplementary material for: Transcriptome analysis of grain development in hexaploid wheat
Source: Springer Nature journal article supplement (doi:10.1186/1471-2164-9-121), 2008-03-06
Supplement: 12864_2007_1315_MOESM6_ESM.pdf [file 12864_2007_1315_MOESM6_ESM.pdf]

**Figure S4 a.** Phylogenetic tree of Yabby proteins. The tree was constructed from the rice and Arabidopsis sequences from the plnTFDB (Riano-Pachon et.al. 2007), with the addition of OsYb7 (BAF45808), the barley sequences CA024106, TA34634, TA40171, maize sequences TA207636, TA178808, AY313904, TA190186, TA176465, TA176459 TA220515, TA184239 and wheat proteins corresponding to probe sets Ta4352.1.S1 (AF545436), Ta14101.1.S1(TA64727), Ta7721.1.S1 (TA69349), Ta678.1.S1 (TA90793), Ta7227.1.S1 (CK205871). The tree was generated using the maximum likelihood method PHYML (Guindon and Gascuel 2003). Bootstrap values above 60% are shown.**b.** Amino acid alignment of the zinc finger and YABBY domains generated using CLUSTAL X. Gaps in the sequences and between domains are indicated by dashes.

**a**

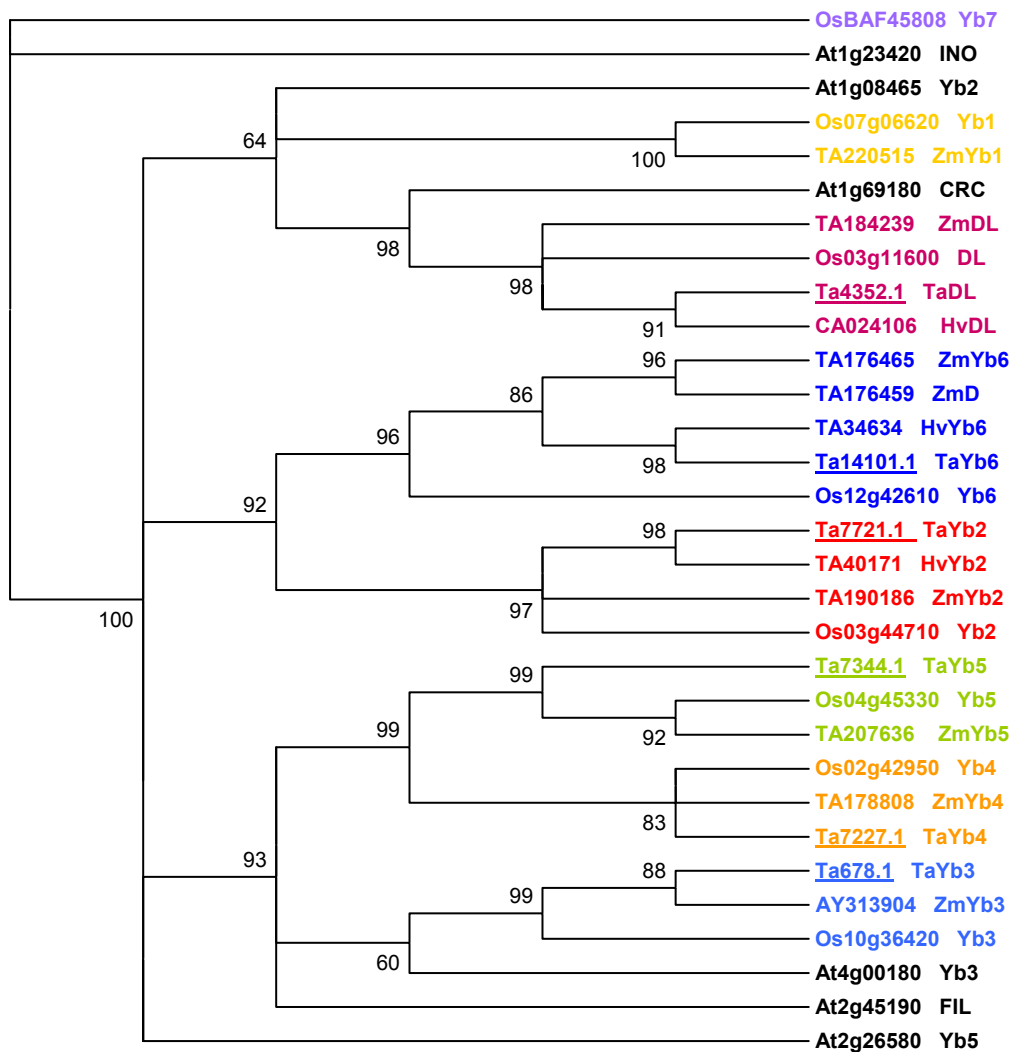

b

OsBAF45808 Yb7 LRERLCEVQCSFCAITVLLVSVPCSSVLRVVAVQCGHCSGLLSAV-NLPPSPV-NKPPQRQRHPSAYNCFVKEEIKRIKSMENITDEKQAFSAAKNWAHPPRIQOKRGRDSC  
At1g23420 INO LPQCHCEVQCFQCTITLLVSVVPSLSMVTVTRCGHCTSLLSVN-LMKASFI-NKPPEKRQRHPSAYNCFVKEEIKRIKSNPMAKREAFSAAKNWAHFPFAHKKRAASDQ  
At1g69180 CRC QAEHLVYVRCSTICNTILAVSIPKRRMLDVTVTRCGHCNLSFLT-TTPFLQG-VKPPEKQRHPSAYNRFMRDEIQRIKSNPETHREAFSAAKNWAHYIIPNSPTSTTSGG  
Os03g11600 DL PSEHLCYVRCYICNTVLAIVSPCKRLMDVTVTRCGHCNLSFLS-PRPPMVQ-VKPPEKQRHPSAYNRFMRDEIQRIKSNPETHREAFSAAKNWAHCDPRCSTTVSTSN  
Ta4352.1 TaDL PSEHLCYVRCYICNTVLAIVSPCKRLMDVTVTRCGHCNLSFLS-PRPPMVQ-VKPPEKQRHPSAYNRFMRDEIQRIKSNPETHREAFSAAKNWAHCDPRCSTTVSASN  
TA184239 ZmDL QSEHLCYVRCYICNTVLAIVSPCKRLMDVTVTRCGHCNLSYLS-PRPPMVQ-VKPPEKQRHPSAYNRFMRDEIQRIKSNPETHREAFSAAKNWAHCDPRCSTTASTAT  
CA024106 HvDL PSEHLCYVRCYICNTVLAIVSPCKRLMDVTVTRCGHCNLSFLS-PRPPMVQ-VKPPEKQRHPSAYNRFMRDEIQRIKSNPETHREAFSAAKNWAHCDPRCSTTVSTSN  
Os07g06620 Yb1 TSEHVCYVNCNFCNTILAVSVPSNSYNIIVTVTRCGHCTMVLSD-LAPFHQA-TRPPEKRQRVPSAYNRFKKEIQRIKSNPETHREAFSAAKNWAHPPRIHFGLSVADG  
TA220515 ZmYb1 TSEHVCYVNCNFCNTILAVSVPSNSYNIIVTVTRCGHCTMVLSD-LSPFHQQ-TRPPEKRQRVPSAYNRFKKEIQRIKSNPETHREAFSAAKNWAHPPRIHFGLSVADG  
TA176459 ZmD PADHVCYVHCFNCTVLAIVSPNSMLNIVTVTRCGHCNLLSVN-LRGLMHS-RRPPEKRQRVPSAYNRFKKEIQRIKSNPETHREAFSAAKNWAHPPRIHFGLSDSGR  
TA176465 ZmYb6 PADHVCYVHCFNCTVLAIVSPNSMLNIVTVTRCGHCTNLLSVN-LRGLMHS-RRPPEKRQRVPSAYNRFKKEIQRIKSNPETHREAFSAAKNWAHPPRIHFGLSRE  
Os12g42610 Yb6 PAEQVCYVHCFNCTVLAIVSPNSMLNIVTVTRCGHCTNLLSVN-LRGLMHS-RRPPEKRQRVPSAYNRFKKEIQRIKSNPETHREAFSAAKNWAHPPRIHFGLSRE  
TA34634 HvYb6 PAEQVCYVHCFNCTVLAIVSPNSMLNIVTVTRCGHCTNLLSVN-LRGLMHS-RRPPEKRQRVPSAYNRFKKEIQRIKSNPETHREAFSAAKNWAHPPRIHFGLSRE  
Ta14101.1 TaYb6 PAEQVCYVHCFNCTVLAIVSPNSMLNIVTVTRCGHCTNLLSVN-LRGLMHS-RRPPEKRQRVPSAYNRFKKEIQRIKSNPETHREAFSAAKNWAHPPRIHFGLSRE  
Os03g44710 Yb2 APEHVCYVHCFNCTVLAIVSPNSMLNIVTVTRCGHCTNLLSVN-LRGLMHS-RRPPEKRQRVPSAYNRFKKEIQRIKSNPETHREAFSAAKNWAHPPRIHFGLSRE  
TA190186 ZmYb2 APEHVCYVHCFNCTVLAIVSPNSMLNIVTVTRCGHCTNLLSVN-LRGLMHS-RRPPEKRQRVPSAYNRFKKEIQRIKSNPETHREAFSAAKNWAHPPRIHFGLSRE  
TA40171 HvYb2 APEHVCYVHCFNCTVLAIVSPNSMLNIVTVTRCGHCTNLLSVN-LRGLMHS-RRPPEKRQRVPSAYNRFKKEIQRIKSNPETHREAFSAAKNWAHPPRIHFGLSRE  
Ta7721.1 TaYb2 APEHVCYVHCFNCTVLAIVSPNSMLNIVTVTRCGHCTNLLSVN-LRGLMHS-RRPPEKRQRVPSAYNRFKKEIQRIKSNPETHREAFSAAKNWAHPPRIHFGLSRE  
At1g08465 Yb2 SSEHVCYVHCFNCTVLAIVSPNSMLNIVTVTRCGHCTNLLSVN-LRGLMHS-RRPPEKRQRVPSAYNRFKKEIQRIKSNPETHREAFSAAKNWAHPPRIHFGLSRE  
At2g26580 Yb5 APEHVCYVHCFNCTVLAIVSPNSMLNIVTVTRCGHCTNLLSVN-LRGLMHS-RRPPEKRQRVPSAYNRFKKEIQRIKSNPETHREAFSAAKNWAHPPRIHFGLSRE  
At2g45190 FII PSDHLCYVQCNFCNTILAVSVPSLSLEKTVTVTRCGHCTNLLSVN-LRGLMHS-RRPPEKRQRVPSAYNRFKKEIQRIKSNPETHREAFSAAKNWAHPPRIHFGLSRE  
Os10g36420 Yb3 EPEHVCYVHCFNCTVLAIVSPNSMLNIVTVTRCGHCTNLLSVN-LRGLMHS-RRPPEKRQRVPSAYNRFKKEIQRIKSNPETHREAFSAAKNWAHPPRIHFGLSRE  
AY313904 ZmYb3 APEHVCYVHCFNCTVLAIVSPNSMLNIVTVTRCGHCTNLLSVN-LRGLMHS-RRPPEKRQRVPSAYNRFKKEIQRIKSNPETHREAFSAAKNWAHPPRIHFGLSRE  
Ta678.1 TaYb3 APEHVCYVHCFNCTVLAIVSPNSMLNIVTVTRCGHCTNLLSVN-LRGLMHS-RRPPEKRQRVPSAYNRFKKEIQRIKSNPETHREAFSAAKNWAHPPRIHFGLSRE  
At4g00180 Yb3 STDQVCYVHCFNCTVLAIVSPNSMLNIVTVTRCGHCTNLLSVN-LRGLMHS-RRPPEKRQRVPSAYNRFKKEIQRIKSNPETHREAFSAAKNWAHPPRIHFGLSRE  
Os02g42950 Yb4 APEHVCYVHCFNCTVLAIVSPNSMLNIVTVTRCGHCTNLLSVN-LRGLMHS-RRPPEKRQRVPSAYNRFKKEIQRIKSNPETHREAFSAAKNWAHPPRIHFGLSRE  
TA178808 ZmYb4 APEHVCYVHCFNCTVLAIVSPNSMLNIVTVTRCGHCTNLLSVN-LRGLMHS-RRPPEKRQRVPSAYNRFKKEIQRIKSNPETHREAFSAAKNWAHPPRIHFGLSRE  
Ta7227.1 Yb4 APEHVCYVHCFNCTVLAIVSPNSMLNIVTVTRCGHCTNLLSVN-LRGLMHS-RRPPEKRQRVPSAYNRFKKEIQRIKSNPETHREAFSAAKNWAHPPRIHFGLSRE  
Os04g45330 Yb5 EPEHVCYVHCFNCTVLAIVSPNSMLNIVTVTRCGHCTNLLSVN-LRGLMHS-RRPPEKRQRVPSAYNRFKKEIQRIKSNPETHREAFSAAKNWAHPPRIHFGLSRE  
Ta7344.1 Yb5 EPEHVCYVHCFNCTVLAIVSPNSMLNIVTVTRCGHCTNLLSVN-LRGLMHS-RRPPEKRQRVPSAYNRFKKEIQRIKSNPETHREAFSAAKNWAHPPRIHFGLSRE  
TA207636 ZmYb5 EPEHVCYVHCFNCTVLAIVSPNSMLNIVTVTRCGHCTNLLSVN-LRGLMHS-RRPPEKRQRVPSAYNRFKKEIQRIKSNPETHREAFSAAKNWAHPPRIHFGLSRE
