# Supplementary material for: Transcriptome analysis of grain development in hexaploid wheat
Source: Springer Nature journal article supplement (doi:10.1186/1471-2164-9-121), 2008-03-06
Supplement: 12864_2007_1315_MOESM7_ESM.pdf [file 12864_2007_1315_MOESM7_ESM.pdf]

**Figure S5.** Alignment using the CLUSTAL X program of wheat ARF proteins corresponding to the probe sets Ta7431.1.S1 (TA76217), Ta13246.1.S1 (TA76218), and Ta2593.2.S1 (TA54498) with rice and Arabidopsis proteins from the plnTFDB (Riano-Pachon et. al. 2007) showing the highest BLAST scores. The upper group of proteins correspond to members of subgroup Class III and the lower group to subclass Ia (Wang *et. al.* 2007). Shading is based on amino acid identities and properties.

Ta7431.1  
Ta13246.1  
Os10g33940  
Os06g47150  
Os04g43910  
Os02g41800  
At4g30080  
At2g28350  
Os02g35140  
At1g36054  
At1959750  
Os11g32110  
Os12g29520  
At5g62000  
Os01g70270  
Ta2593.2

Ta7431.1  
Ta13246.1  
Os10g33940  
Os06g47150  
Os04g43910  
Os02g41800  
At4g30080  
At2g28350  
Os02g35140  
Os04g36054  
At1g59750  
Os11g32110  
Os12g29520  
At5g62000  
Os01g70270  
Ta2593.2

Ta7431.1  
Ta13246.1  
Os10g33940  
Os06g47150  
Os04g43910  
Os02g41800  
At4g30080  
At2g28350  
Os02g35140  
Os04g36054  
At1g59750  
Os11g32110  
Os12g29520  
At5g62000  
Os01g70270  
Ta2593.2

Ta7431.1  
Ta13246.1  
Os10g33940  
Os06g47150  
Os04g43910  
Os02g41800  
At4g30080  
At2g28350  
Os02g35140  
Os04g36054  
At1g59750  
Os11g32110  
Os12g29520  
At5g62000  
Os01g70270  
Ta2593.2

Ta7431.1  
Ta13246.1  
Os10g33940  
Os06g47150  
Os04g43910  
Os02g41800  
At4g30080  
At2g28350  
Os02g35140  
Os04g36054  
At1g59750  
Os11g32110  
Os12g29520  
At5g62000  
Os01g70270  
Ta2593.2
